# Supplementary material for: Comparative Genomics of Wolbachia and the Bacterial Species Concept
Source: PubMed Central journal article supplement (PMC3616963; doi:10.1371/journal.pgen.1003381), 2013-04-04

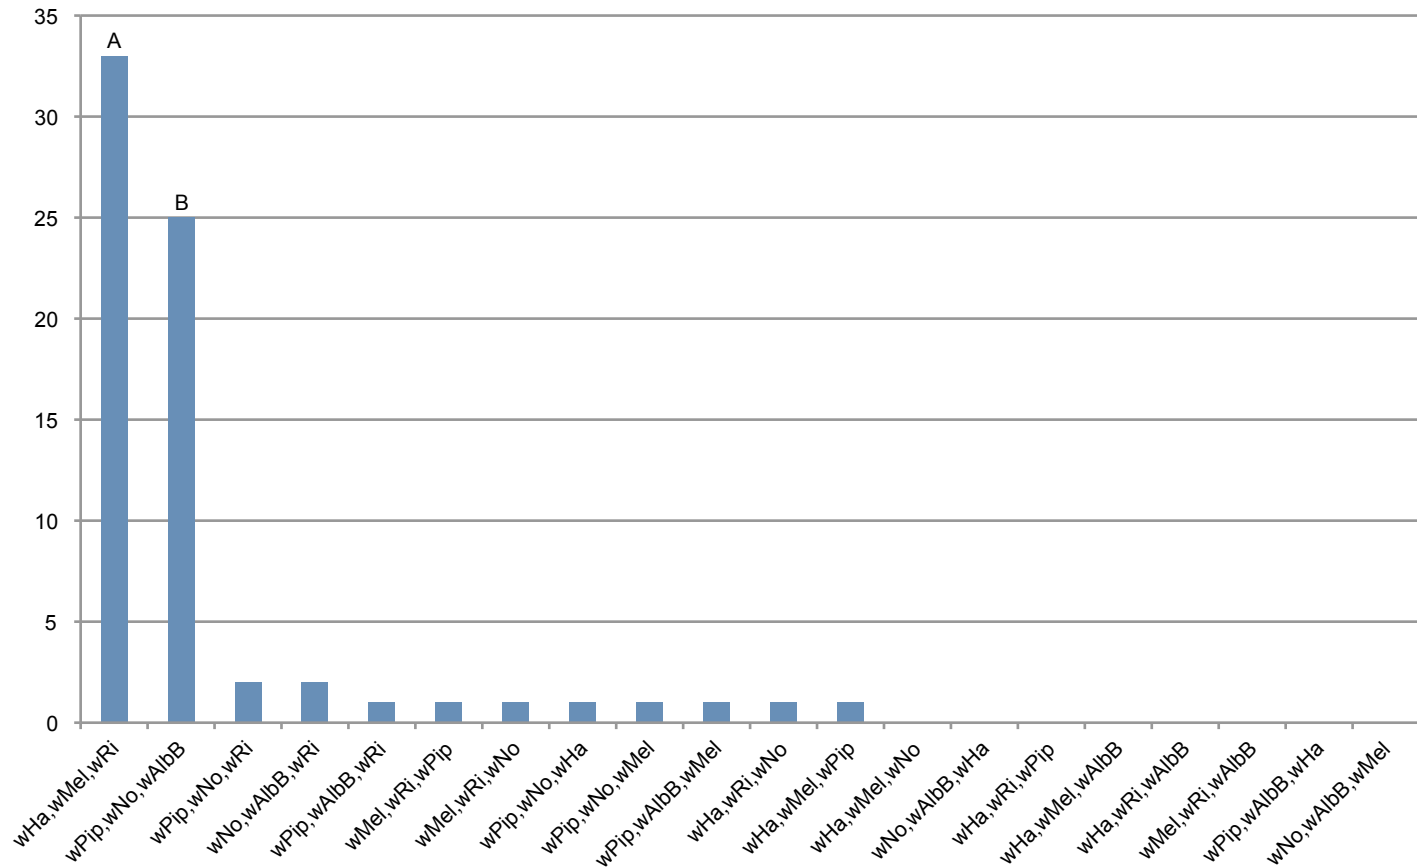

Supplement: pgen.1003381.s008.pdf [file pgen.1003381.s008.pdf]
